# Supplementary material
Source: MDPI journal article supplement (https://www.mdpi.com/2073-4395/13/11/2846)
Supplement: s1 [file s1]

**Table S1.** Effects of planting pattern and phosphorus application on topsoil mechanical aggregate.

| Treatment                     | >2       |          | 2–1      |          | 1–0.5    |          | 0.5–0.25 |          | <0.25    |          |
|-------------------------------|----------|----------|----------|----------|----------|----------|----------|----------|----------|----------|
|                               | <i>F</i> | <i>P</i> |
| P level                       | 63.6     | ***      | 0.9      | ns       | 18.2     | ***      | 46.8     | ***      | 21.0     | ***      |
| Planting pattern              | 43.0     | ***      | 80.4     | ***      | 8.1      | ***      | 76.6     | ***      | 187.2    | ***      |
| P level ×<br>Planting pattern | 69.9     | ***      | 14.2     | ***      | 7.4      | ***      | 110.2    | ***      | 71.7     | ***      |

*F*: equality of variances; *P*: significant test. \*Significant at  $P<0.05$ . \*\*Significant at  $P<0.01$ . \*\*\*Significant at  $P<0.001$ . ns: not significant. Data are presented as mean ± standard error.

**Table S2.** Effects of planting pattern and phosphorus application on topsoil water-stable aggregate.

| Treatment                  | >2       |          | 2–1      |          | 1–0.5    |          | 0.5–0.25 |          | 0.25–0.053 |          | <0.053   |          |
|----------------------------|----------|----------|----------|----------|----------|----------|----------|----------|------------|----------|----------|----------|
|                            | <i>F</i> | <i>P</i> | <i>F</i> | <i>P</i> | <i>F</i> | <i>P</i> | <i>F</i> | <i>P</i> | <i>F</i>   | <i>P</i> | <i>F</i> | <i>P</i> |
| P level                    | 33.0     | ***      | 97.8     | ***      | 4.4      | *        | 9.2      | **       | 10.1       | **       | 191.1    | ***      |
| Planting pattern           | 19.5     | ***      | 90.4     | ***      | 99.9     | ***      | 4.8      | **       | 24.4       | ***      | 54.9     | ***      |
| P level × Planting pattern | 1.6      | ns       | 0.3      | ns       | 4.8      | **       | 0.2      | ns       | 6.0        | **       | 3.0      | ns       |

*F*: equality of variances; *P*: significant test. \*Significant at  $P<0.05$ . \*\*Significant at  $P<0.01$ . \*\*\*Significant at  $P<0.001$ . ns: not significant. Data are presented as mean  $\pm$  standard error.

**Table S3.** Effects of planting pattern and phosphorus application on topsoil organic carbon concentration in aggregates.

| Treatment                  | >2       |          | 2–1      |          | 1–0.5    |          | 0.5–0.25 |          | <0.25    |          |
|----------------------------|----------|----------|----------|----------|----------|----------|----------|----------|----------|----------|
|                            | <i>F</i> | <i>P</i> |
| P level                    | 193.5    | ***      | 35.8     | ***      | 29.3     | ***      | 9.6      | ***      | 47.0     | ***      |
| Planting pattern           | 100.3    | ***      | 96.1     | ***      | 42.3     | ***      | 3.6      | ***      | 8.9      | ***      |
| P level × Planting pattern | 11.7     | ***      | 28.2     | ***      | 36.9     | ***      | 8.8      | ***      | 11.4     | ***      |

*F*: equality of variances; *P*: significant test. \*Significant at  $P<0.05$ . \*\*Significant at  $P<0.01$ . \*\*\*Significant at  $P<0.001$ . ns: not significant. Data are presented as mean ± standard error.

**Table S4.** Effects of planting pattern and phosphorus application on topsoil organic carbon contribution rate in aggregates.

| Treatment                  | >2       |          | 2–1      |          | 1–0.5    |          | 0.5–0.25 |          | <0.25    |          |
|----------------------------|----------|----------|----------|----------|----------|----------|----------|----------|----------|----------|
|                            | <i>F</i> | <i>P</i> |
| P level                    | 5.6      | *        | 15.1     | ***      | 0.5      | ns       | 2.3      | ns       | 4.1      | ns       |
| Planting pattern           | 50.6     | ***      | 7.7      | ***      | 20.2     | ***      | 70.4     | ***      | 161.3    | ***      |
| P level × Planting pattern | 39.8     | ***      | 2.0      | ns       | 11.4     | ***      | 62.3     | ***      | 39.7     | ***      |

*F*: equality of variances; *P*: significant test. \*Significant at  $P<0.05$ . \*\*Significant at  $P<0.01$ . \*\*\*Significant at  $P<0.001$ . ns: not significant. Data are presented as mean ± standard error.
